# Supplementary material for: Correction: Glycogen Synthase Kinase-3 Inhibition Sensitizes Pancreatic Cancer Cells to Chemotherapy by Abrogating the TopBP1/ATR–mediated DNA Damage Response
Source: Oxford University Press journal article supplement (doi:10.1158/1078-0432.ccr-19-0799), 2019-11-01
Supplement: 10780432ccr190799-sup-218618_2_supp_5635966_pwdw9h.docx [file 10780432ccr190799-sup-218618_2_supp_5635966_pwdw9h.docx]

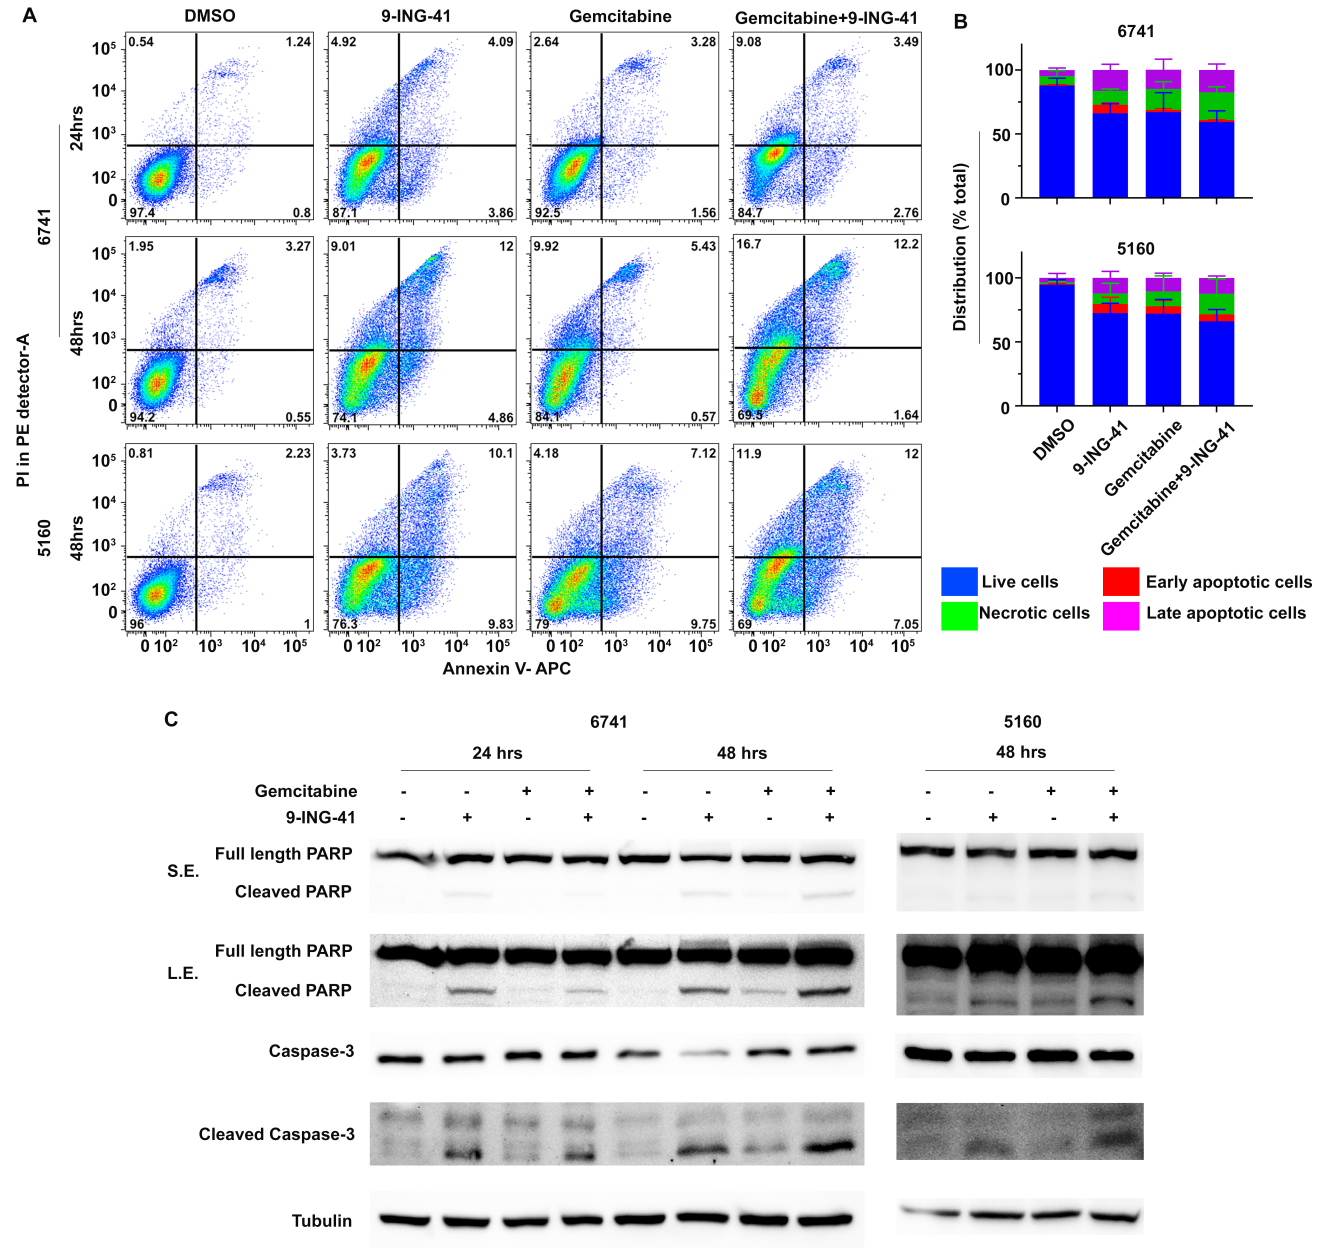


**Supplemental Figure S2**

**GSK-3 inhibition leads to cell death and sensitizes PDAC cells to gemcitabine *in vitro*.** (A) 5160, 6741 cells were treated with DMSO, 9-ING-41 (5 µM), gemcitabine (1 µM), both 9-ING-41 (5 µM) and gemcitabine (1 µM) for 24 or 48 hours. The treated cells were collected and stained with annexin V-APC and PI to evaluate cell death. Shown are representative Flowjo analyses from each treatment condition. (B) Percentage of live cells (duel negative), early apoptotic cells (Annexin V positive/PI negative), necrotic cells (Annexin V negative/PI positive) and late apoptotic cells (duel positive) from 5160 and 6741 cells were quantified and expressed as mean ± SEM. n=3. (C) 5160 and 6741 cells were treated as indicated in supplement Figure S3A and lysates were prepared and immunoblotted with the indicated antibodies.
