# Supplementary material for: Correction: Glycogen Synthase Kinase-3 Inhibition Sensitizes Pancreatic Cancer Cells to Chemotherapy by Abrogating the TopBP1/ATR–mediated DNA Damage Response
Source: Oxford University Press journal article supplement (doi:10.1158/1078-0432.ccr-19-0799), 2019-11-01
Supplement: 10780432ccr190799-sup-218618_2_supp_5635968_p5dw9h.docx [file 10780432ccr190799-sup-218618_2_supp_5635968_p5dw9h.docx]

**
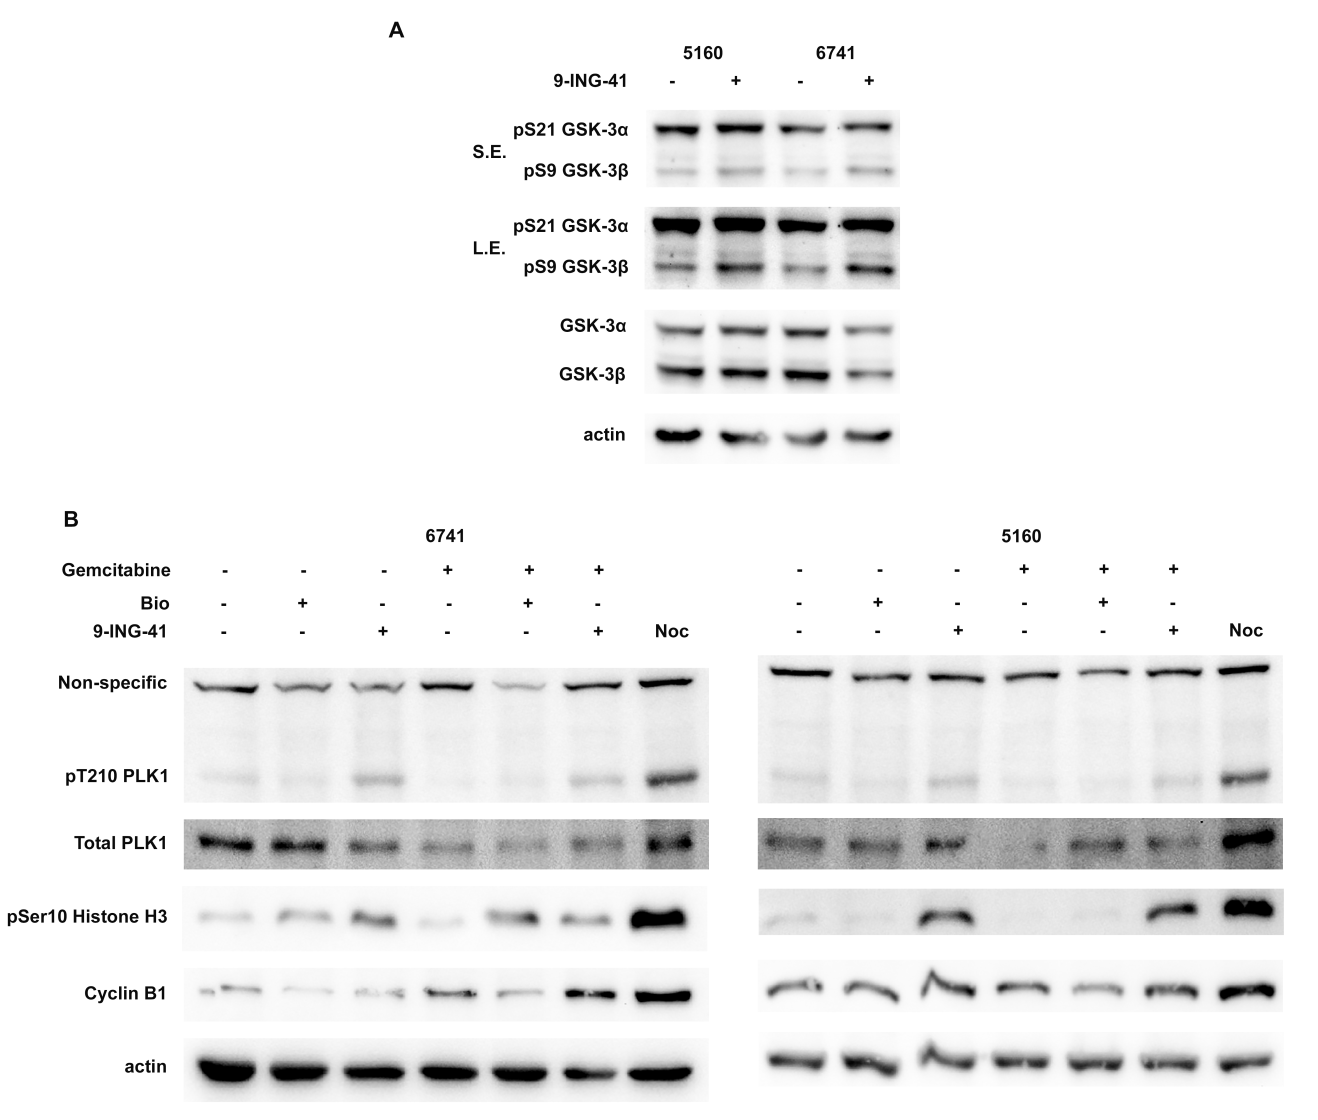
**

**Supplemental Figure S4**

**9-ING-41 reduces the activity of GSK-3β and maintains the phosphorylation of Plk1 with the combination of gemcitabine.** (A) 5160 and 6741 cells were treated with DMSO or 9-ING-41 (5 µM) for 24 hours and lysates were collected and immunoblotted with the indicated antibodies. S.E.: short exposure. L.E.: long exposure. (B) 5160, 6741 cells were treated as indicated in Figure 3B and lysates were prepared and immunoblotted with the indicated antibodies. Lysates from M phase arrested 5160 and 6741 cells induced by thymidine and nocodazole block were used as a positive control. Noc: nocodazole.
